# Supplementary material
Source: PubMed Central journal article supplement (PMC2662916)
Supplement: supp_173_9_970__1.pdf [file supp_173_9_970__1.pdf]

*Associations of Tumor Necrosis Factor G-308A with*  
**Childhood Asthma and Wheezing**

Yu-Fen Li, PhD, MPH, W. James Gauderman, PhD, Ed Avol, MS,

Louis Dubeau, MD, PhD, and Frank D. Gilliland, MD, PhD

ONLINE DATA SUPPLEMENT

**Table E1. Characteristics of CHS participants, with and without TNF genotyping results.**

|                                              | With TNF genotyped |       | Without TNF genotyped |       |
|----------------------------------------------|--------------------|-------|-----------------------|-------|
|                                              | n                  | %     | n                     | %     |
| Total = 6259                                 | 3699               | 59.1% | 2560                  | 40.9% |
| <b>Demographic information</b>               |                    |       |                       |       |
| Gender                                       |                    |       |                       |       |
| Girls                                        | 1978               | 53.5% | 1267                  | 49.5% |
| Boys                                         | 1721               | 46.5% | 1293                  | 50.5% |
| Age at study entry                           |                    |       |                       |       |
| 8-9                                          | 1939               | 52.5% | 966                   | 37.7% |
| 10-11                                        | 787                | 21.3% | 561                   | 21.9% |
| 12-13                                        | 552                | 14.9% | 449                   | 17.5% |
| 14-18                                        | 421                | 11.3% | 584                   | 22.8% |
| Ethnicity                                    |                    |       |                       |       |
| Non-Hispanic Whites                          | 2182               | 59.0% | 1243                  | 48.6% |
| Hispanics                                    | 989                | 26.7% | 784                   | 30.6% |
| African Americans                            | 156                | 4.2%  | 178                   | 6.9%  |
| Asians                                       | 157                | 4.2%  | 132                   | 5.2%  |
| Others                                       | 215                | 5.8%  | 223                   | 8.7%  |
| Gestational Age                              |                    |       |                       |       |
| Full term                                    | 3189               | 86.2% | 2191                  | 85.6% |
| < 4 weeks early                              | 254                | 6.9%  | 144                   | 5.6%  |
| ≥ 4 weeks early                              | 160                | 4.3%  | 79                    | 3.1%  |
| Missing                                      | 99                 | 2.7%  | 146                   | 5.7%  |
| <i>In utero</i> exposure to maternal smoking |                    |       |                       |       |
| Yes                                          | 603                | 16.9% | 527                   | 22.0% |
| Any lifetime SHS exposure                    |                    |       |                       |       |
| Yes                                          | 1230               | 34.6% | 1134                  | 47.6% |
| Current SHS exposure                         |                    |       |                       |       |
| Yes                                          | 650                | 18.1% | 716                   | 29.7% |
| Ozone exposure                               |                    |       |                       |       |
| High (≥ 50 ppb)                              | 2166               | 58.6% | 1535                  | 60.0% |
| Lifetime residence                           |                    |       |                       |       |
| Yes                                          | 1271               | 34.4% | 815                   | 31.8% |
| <b>Respiratory Outcomes</b>                  |                    |       |                       |       |
| Ever asthma                                  | 551                | 15.2% | 319                   | 13.1% |
| Ever wheezing                                | 1222               | 34.8% | 738                   | 31.3% |
| Current wheezing*                            | 704                | 23.6% | 429                   | 21.0% |
| Medication for wheezing*                     | 401                | 14.9% | 238                   | 12.8% |

SHS = second-hand smoke

\* based on self-report for the past 12 months

**Table E2. Primer and Probe Sequences for TNF, GSTM1 and GSTP1 A105G Variants**

| GENE         |                    | Sequences                        |
|--------------|--------------------|----------------------------------|
| <i>TNF</i>   | Forward primer     | 5'-GAAATGGAGGCAATAGGTTTTGA-3'    |
|              | Reverse primer     | 5'-GTAGGACCCTGGAGGCTGAAC-3'      |
|              | Probe for G allele | 5'-(6FAM)CCGTCCCCATGCC-3'        |
|              | Probe for A allele | 5'-(VIC)-CCGTCCTCATGCC3'         |
| <i>GSTM1</i> | Forward primer     | 5'-TGGAACCTCCATAACACGTGA-3'      |
|              | Reverse primer     | 5'-TGGAAACTTCTGCAAACCTCAGC-3'    |
|              | Probe              | 5'-(6FAM)AAGCGGCCATGGTTTGCAGG-3' |
| <i>GSTP1</i> | Forward primer     | 5'-CCTGGTGGACATGGTGAATG-3'       |
|              | Reverse primer     | 5'-TGCTCACATAGTTGGTGTAGATGA-3'   |
|              | Probe for A allele | 5'-(6FAM)TGCAAATACATCTCCCT-3'    |
|              | Probe for G allele | 5'-(VIC)CTGCAAATACGTCTCC-3'      |

**Table E3. Associations of *TNF* G-308A with Asthma and Wheezing Outcomes in Children at CHS entry, odds ratio (OR) and 95% confidence interval (CI) in two cohorts of 4<sup>th</sup> graders**

| Outcomes                | <i>TNF</i> | Cohort 1 entered<br>in 1993 |            | Cohort 2 entered<br>in 1996 |            |
|-------------------------|------------|-----------------------------|------------|-----------------------------|------------|
|                         |            | OR                          | 95% CI     | OR                          | 95% CI     |
| Ever asthma             | GA/AA      | 1.0                         | -- --      | 1.0                         | -- --      |
|                         | GG         | 0.8                         | (0.6, 1.0) | 0.8                         | (0.6, 1.2) |
| Ever wheezing           | GA/AA      | 1.0                         | -- --      | 1.0                         | -- --      |
|                         | GG         | 0.8                         | (0.7, 1.0) | 0.7                         | (0.6, 0.9) |
| Current wheezing        | GA/AA      | 1.0                         | -- --      | 1.0                         | -- --      |
|                         | GG         | 0.7                         | (0.6, 0.9) | 0.7                         | (0.5, 0.9) |
| Medication for wheezing | GA/AA      | 1.0                         | -- --      | 1.0                         | -- --      |
|                         | GG         | 0.7                         | (0.5, 0.9) | 0.6                         | (0.3, 0.8) |

Models are adjusted for age, sex, race/ethnicity, town, lifetime residence, grade, and smoking exposure (*in utero* and second-hand)

**Table E4. The association of *TNF* G-308A with asthma and wheezing outcomes in 4th-grade CHS participants in lower and higher ozone communities \*, odds ratio (OR) and 95% confidence interval (CI) in two cohorts of 4<sup>th</sup> graders**

| Outcomes                | <i>TNF</i> | Cohort 1 entered in 1993 |            |    |            |            |    |
|-------------------------|------------|--------------------------|------------|----|------------|------------|----|
|                         |            | Low ozone                |            |    | High ozone |            |    |
|                         |            | OR                       | 95% CI     |    | OR         | 95% CI     |    |
| Ever asthma             | GA/AA      | 1.0                      | --         | -- | 1.0        | --         | -- |
|                         | GG         | 0.8                      | (0.4, 1.5) |    | 0.9        | (0.6, 1.4) |    |
| Ever wheezing           | GA/AA      | 1.0                      | --         | -- | 1.0        | --         | -- |
|                         | GG         | 0.6                      | (0.4, 0.9) |    | 1.0        | (0.7, 1.5) |    |
| Current wheezing        | GA/AA      | 1.0                      | --         | -- | 1.0        | --         | -- |
|                         | GG         | 0.6                      | (0.4, 1.1) |    | 0.9        | (0.6, 1.4) |    |
| Medication for wheezing | GA/AA      | 1.0                      | --         | -- | 1.0        | --         | -- |
|                         | GG         | 0.6                      | (0.3, 1.2) |    | 0.8        | (0.5, 1.4) |    |
| Outcomes                | <i>TNF</i> | Cohort 2 entered in 1996 |            |    |            |            |    |
|                         |            | Low ozone                |            |    | High ozone |            |    |
|                         |            | OR                       | 95% CI     |    | OR         | 95% CI     |    |
| Ever asthma             | GA/AA      | 1.0                      | --         | -- | 1.0        | --         | -- |
|                         | GG         | 0.7                      | (0.4, 1.3) |    | 0.9        | (0.6, 1.5) |    |
| Ever wheezing           | GA/AA      | 1.0                      | --         | -- | 1.0        | --         | -- |
|                         | GG         | 0.5                      | (0.4, 0.8) |    | 0.9        | (0.7, 1.3) |    |
| Current wheezing        | GA/AA      | 1.0                      | --         | -- | 1.0        | --         | -- |
|                         | GG         | 0.5                      | (0.3, 0.8) |    | 0.9        | (0.6, 1.3) |    |
| Medication for wheezing | GA/AA      | 1.0                      | --         | -- | 1.0        | --         | -- |
|                         | GG         | 0.3                      | (0.2, 0.6) |    | 0.9        | (0.5, 1.5) |    |

Models are adjusted for age, sex, race/ethnicity, town, lifetime residence, grade, and smoking exposure (*in utero* and second-hand)

**Table E5. Associations of GSTM1 and GSTP1 with Wheezing Outcomes in 4th-grade CHS Children, odds ratio (OR) and 95% confidence interval (CI)**

| Outcomes                | GSTM1 (ref=present) |        |      | GSTP1 (ref=Ile/Ile) |        |      |
|-------------------------|---------------------|--------|------|---------------------|--------|------|
|                         | OR                  | 95% CI |      | OR                  | 95% CI |      |
| Ever wheezing           | 1.0                 | --     | --   | 1.0                 | --     | --   |
|                         | 0.9                 | (0.8,  | 1.1) | 1.0                 | (0.9,  | 1.2) |
| Current wheezing        | 1.0                 | --     | --   | 1.0                 | --     | --   |
|                         | 1.0                 | (0.8,  | 1.2) | 1.1                 | (0.9,  | 1.3) |
| Medication for wheezing | 1.0                 | --     | --   | 1.0                 | --     | --   |
|                         | 0.9                 | (0.7,  | 1.3) | 1.1                 | (0.9,  | 1.5) |

Models are adjusted for age, sex, race/ethnicity, town, lifetime residence, grade, and smoking exposure (*in utero* and second-hand)
